# Supplementary material
Source: MDPI journal article supplement (https://www.mdpi.com/2311-5637/9/7/608)
Supplement: s1 [file s1]

## Supplementary Materials:

# Screening of Ultraviolet-Induced Thermotolerant Yeast Mutants and Their Performance

Xiaodi Li <sup>1</sup>, Yan Lin <sup>2</sup>, Hainan Kong <sup>2</sup> and Zhiquan Wang <sup>3,4,\*</sup>

<sup>1</sup> State Key Laboratory of Pollution Control and Resource Reuse, College of Environmental Science and Engineering, Tongji University, Shanghai 200092, China; 2010423@tongji.edu.cn

<sup>2</sup> School of Environmental Science and Engineering, Shanghai Jiao Tong University, Shanghai 200240, China; linyansjtu@126.com (Y.L.); hnkong@sjtu.edu.cn (H.K.)

<sup>3</sup> College of Life and Environmental Science, Wenzhou University, Wenzhou 325035, China

<sup>4</sup> Institute for Eco-Environmental Research of Sanyang Wetland, Wenzhou University, Wenzhou 325035, China

\* Correspondence: zqwang\_wzu@126.com; Tel.: +86-18217288970

**Table S1.** The components of the fermentation medium.

| Component                                           | Concentration |
|-----------------------------------------------------|---------------|
| Glucose                                             | 80 g/L        |
| NH <sub>4</sub> Cl                                  | 3.00 g/L      |
| KH <sub>2</sub> PO <sub>4</sub>                     | 0.70 g/L      |
| MgSO <sub>4</sub> ·7H <sub>2</sub> O                | 0.35 g/L      |
| CaCl <sub>2</sub>                                   | 0.10 g/L      |
| NaCl                                                | 0.10 g/L      |
| MnSO <sub>4</sub> ·4H <sub>2</sub> O                | 0.11 g/L      |
| CuSO <sub>4</sub> ·5H <sub>2</sub> O                | 1.0 mg/L      |
| ZnSO <sub>4</sub> ·7H <sub>2</sub> O                | 21.0 mg/L     |
| CoSO <sub>4</sub> ·7H <sub>2</sub> O                | 4.0 mg/L      |
| H <sub>3</sub> BO <sub>3</sub>                      | 40.0 mg/L     |
| Na <sub>2</sub> MoO <sub>4</sub> ·2H <sub>2</sub> O | 0.2 mg/L      |
| FeSO <sub>4</sub>                                   | 0.14 g/L      |

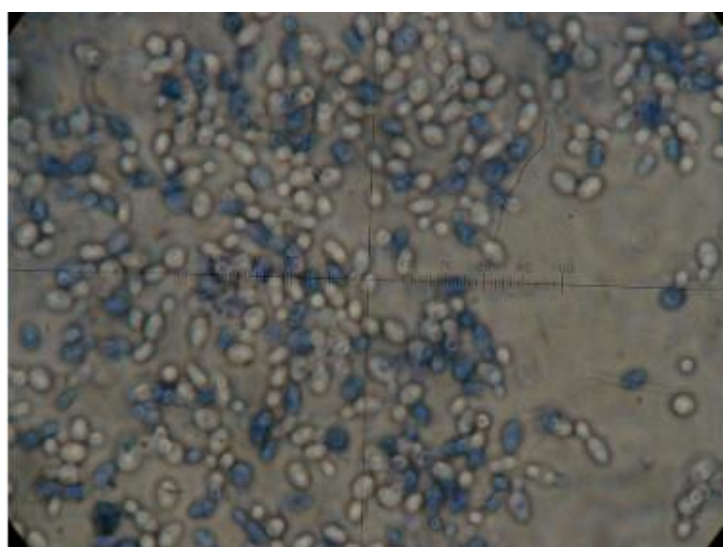

**Figure S1.** Yeasts stained with methylene blue after 20 seconds of UV radiation treatment. The white ones depict living cells, whereas the blue ones depict dead cells.

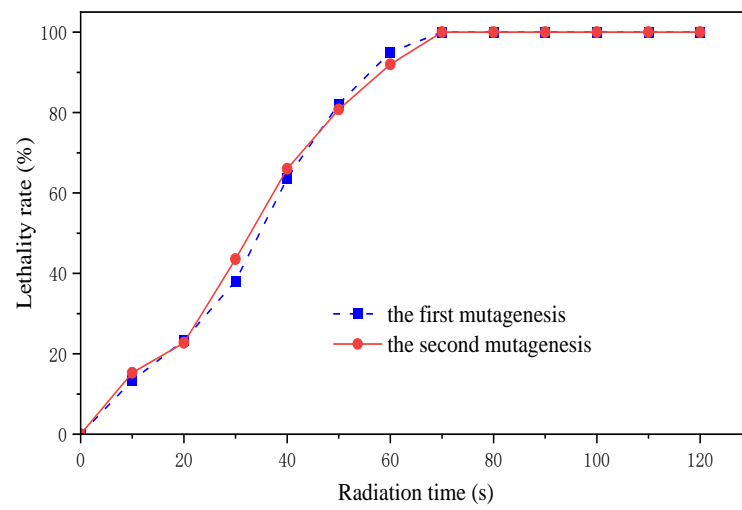

**Figure S2.** Yeast lethally rates under UV irradiation.
